# Supplementary material
Source: MDPI journal article supplement (https://www.mdpi.com/2071-1050/13/20/11329)
Supplement: s1 [file s1]

# Are PM<sub>2.5</sub> in the atmosphere of a small city a threat for health?

Glykeria Loupa <sup>1,\*</sup>, Zoi Kryona <sup>1</sup>, Varvara Pandelidou<sup>1</sup> and Spyridon Rapsomanikis <sup>1</sup>

<sup>1</sup> Laboratory of Atmospheric Pollution and Pollution Control Engineering of Atmospheric Pollutants, Department of Environmental Engineering, Faculty of Engineering, Democritus University of Thrace, P.O. Box 447, 67100 Xanthi, Greece; [gloupa@env.duth.gr](mailto:gloupa@env.duth.gr); [zoipkryo@env.duth.gr](mailto:zoipkryo@env.duth.gr); [varvpant1@env.duth.gr](mailto:varvpant1@env.duth.gr); [rapso@env.duth.gr](mailto:rapso@env.duth.gr)

\* Correspondence: [gloupa@env.duth.gr](mailto:gloupa@env.duth.gr)

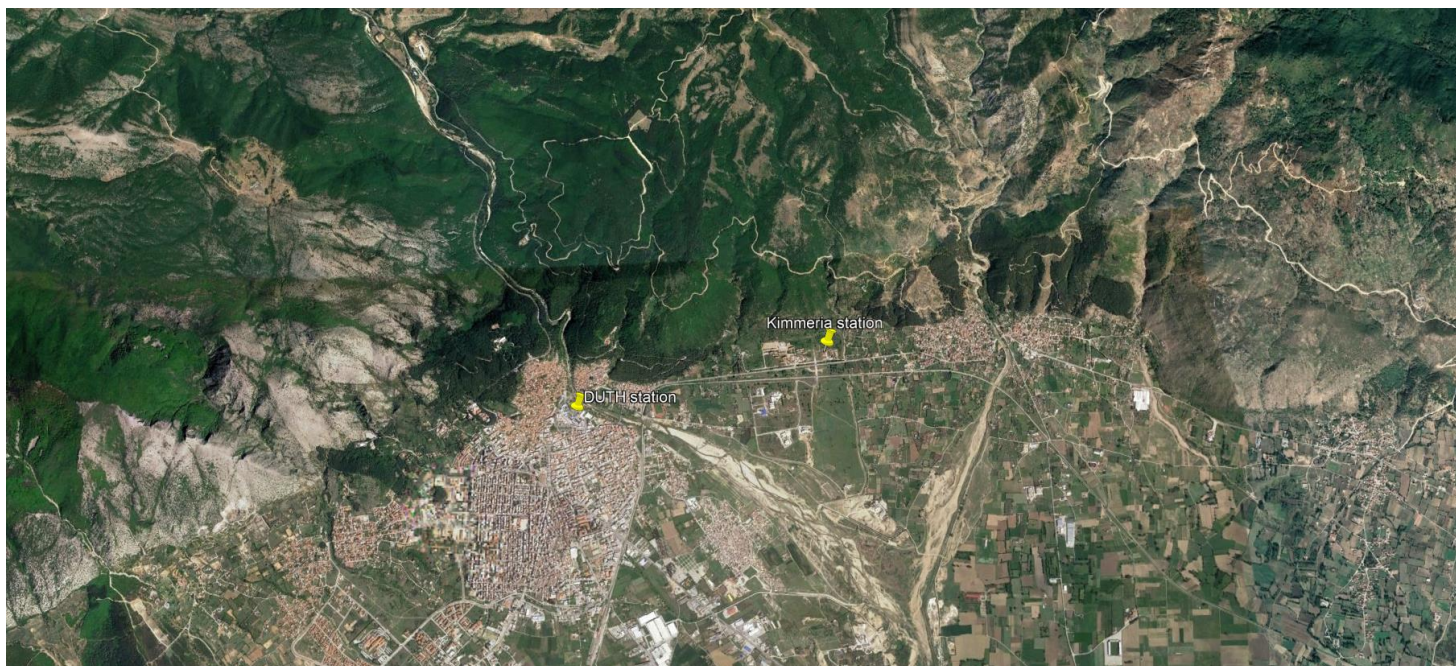

**Figure S1.** Map of the city of Xanthi. The two stations location: DUTH station and Kimmeria station.

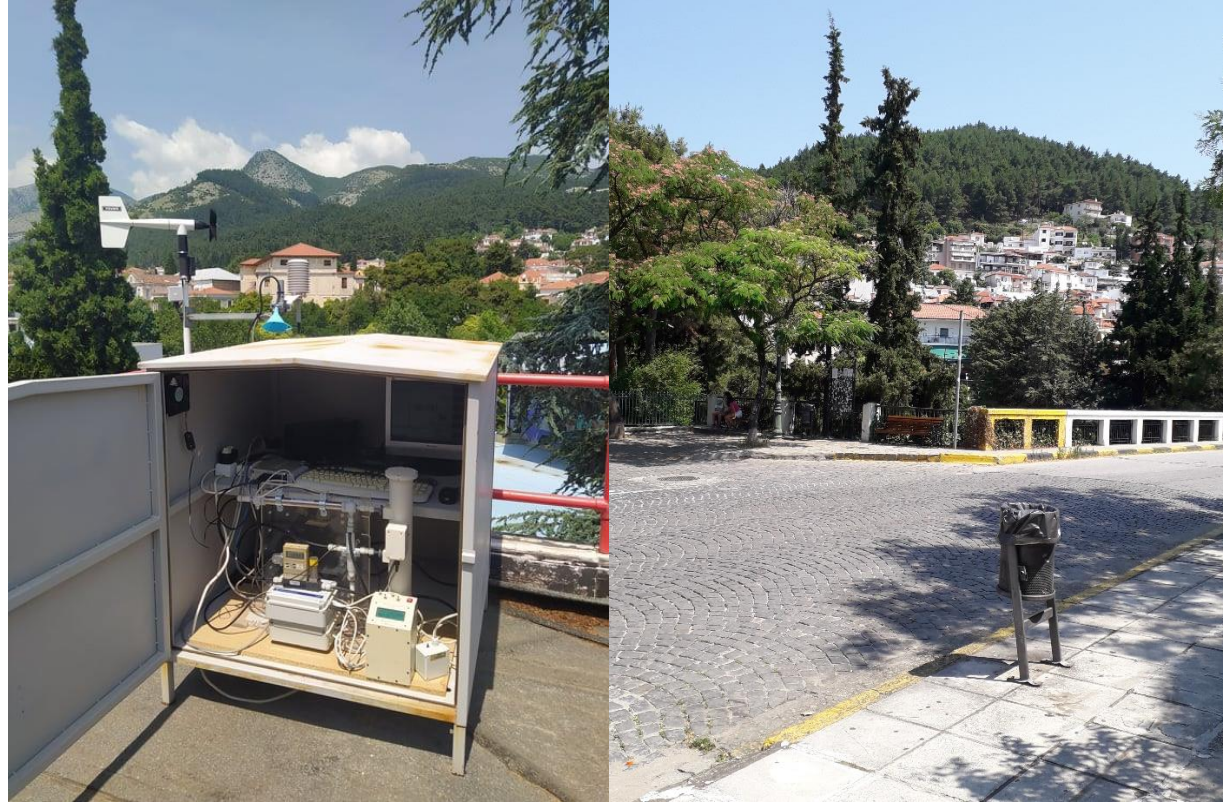

**Figure S2.** DUTH station and a view in N-NE direction.



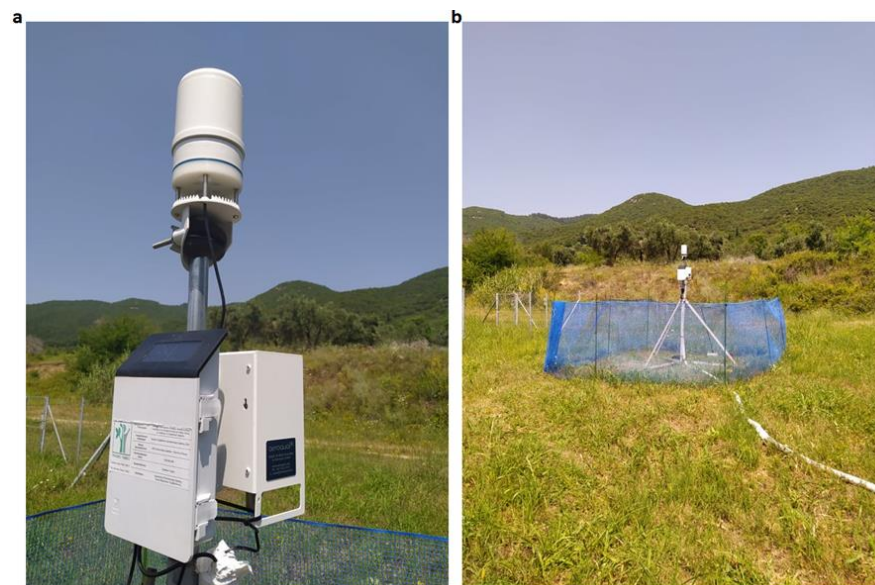

**Figure S3.** Kimmeria station.

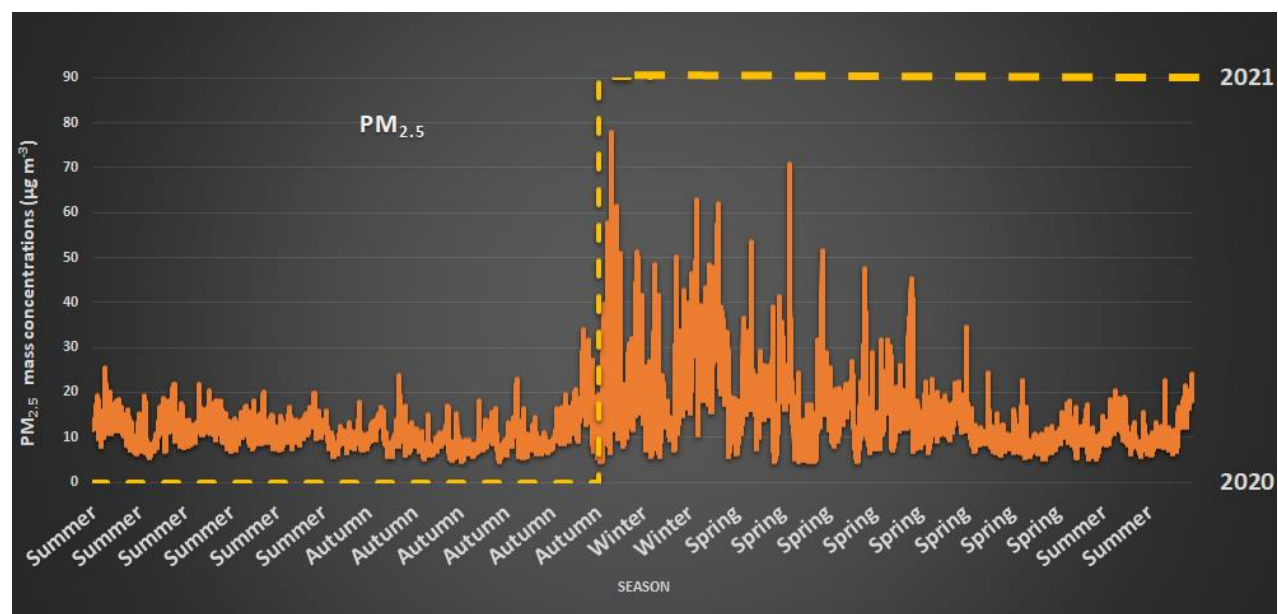

**Figure S4.** PM<sub>2.5</sub> mass concentration time-series in the DUTH station for the years 2020-2021. Dashed line denotes the year 2020 or 2021.

The Figure S5 presents some aspects that explain supplementary the data presented in Figure 3. It relates the 48-h back trajectories for a 2-day period and the respective PM<sub>2.5</sub> mean mass concentrations ( $\mu\text{g m}^{-3}$ ) grouped by the wind direction as it was recorded in the DUTH station.

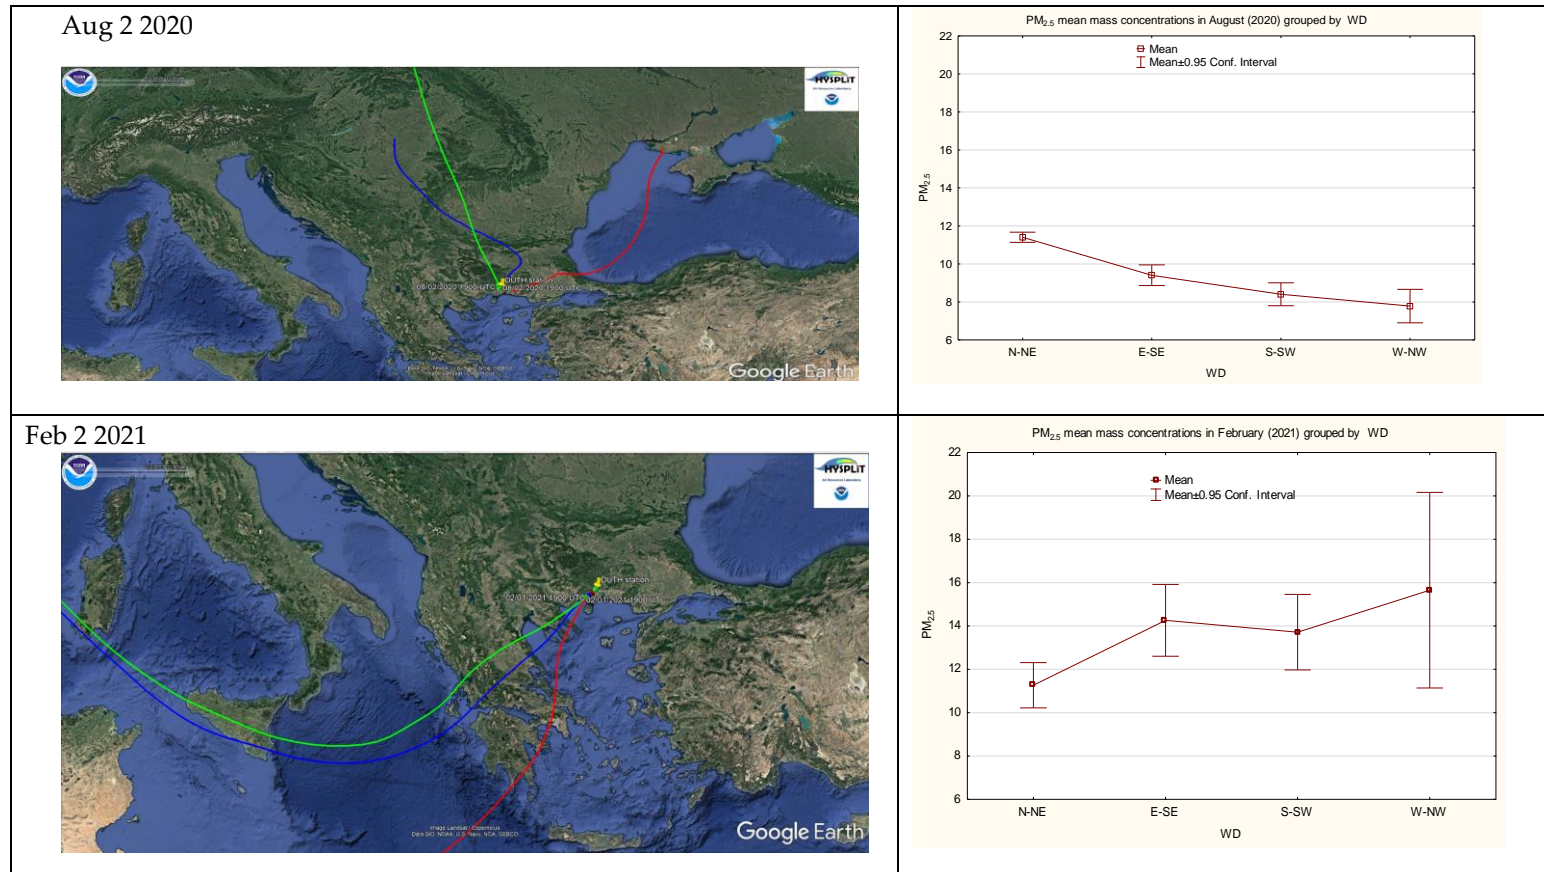

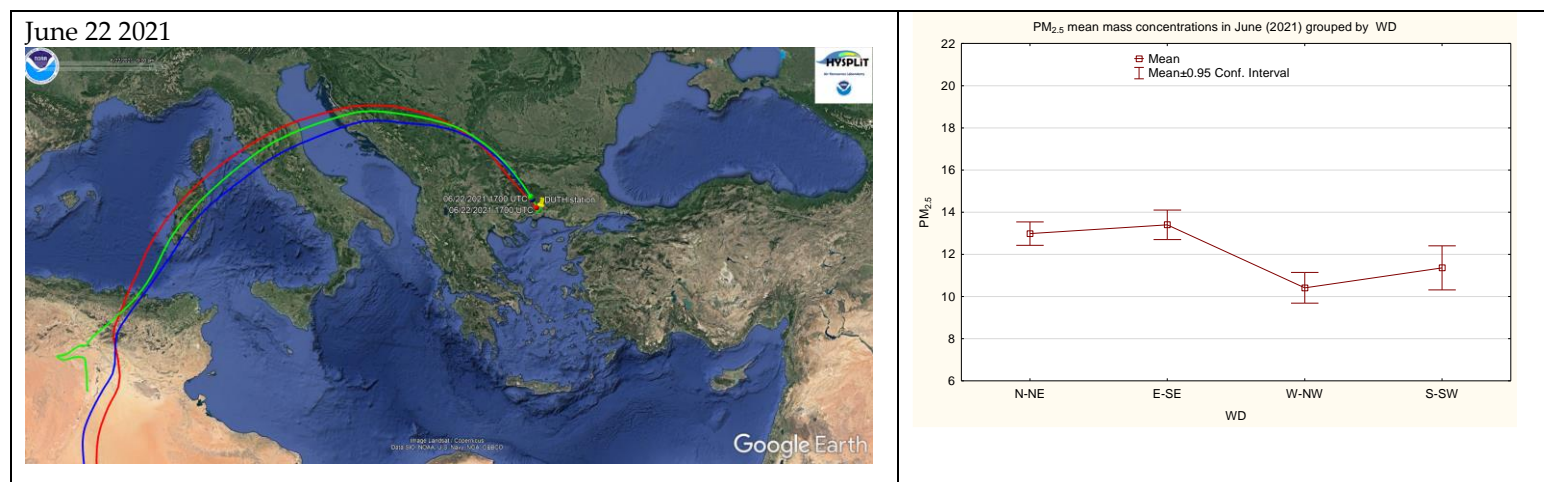

**Figure S5.** Back trajectories in the left and mean PM<sub>2.5</sub> mean mass concentrations ( $\mu\text{g m}^{-3}$ ) grouped by the wind direction.
